# Supplementary material
Source: publisher figshare collection journal article supplement (https://acs.figshare.com/ndownloader/files/21788055)
Supplement: Supplementary file 1 [file 21788055]

## Sheet: Cover page
PROPOSING THE PROMISCUOUS PROTEIN STRUCTURES IN JNK1 AND JNK3 FOR VIRTUAL SCREENING IN PURSUIT OF POTENTIAL LEADS Sailapathi Ananthasri †, Murugan Gopinath1†, Kanagasabai Somarathinam 1, Seshan Gunalan1, Rahul Jagadeesan1, Niyaz Yoosuf2, Sekar Kanagaraj3, Gugan Kothandan1* ¹Biopolymer Modelling Laboratory, Centre of Advanced Study in Crystallography and Biophysics, Guindy Campus, University of Ma…

## Sheet: S1
Supplementary 1 - Re-docking analysis of JNK1
PDB ID	LIGAND	BINDING ENERGY(kcal/mol)	RMSD in Å
1UKI	537	-7.37	1.008
2GMX	877	-7.58	1.31
2H96	893	-6.89	0.92
2NO3	859	-6.92	1.84
2XRW	ANP	-10.06	1.08
2XS0	ANP	-10.21	1.41
3PZE	CFK	-6.61	0.56
3V3V	MYU	-9.15	0.68
4AWI	AQ2	-10.4	1.24
4E 73	0NR	-9.3	1.12
4G1W	G1W	-9.55	0.81
4HYS	1BJ	-7.08	0.82
4HYU	1BK	-9.18	0.84
4IZY	1J2	-10.77	0.7
4L7F	1V5	-13.25	0.61
4QTD	38Z	-11.98	1.36
4UX9	ANP	-10.24	1.23
5LW1	AND	-6.24	1.62
